# Supplementary material
Source: PubMed Central journal article supplement (PMC2516224)
Supplement: 0804157105_0804157105SI.pdf [file 0804157105_0804157105SI.pdf]

# Supporting Information

Grünewald *et al.* 10.1073/pnas.0804157105

## SI Text

**Analytical Size-Exclusion Chromatography.** For quaternary structure analysis of WT and mutant mTNF- $\alpha$ , a Superdex 75 10/300 GL gel filtration column (GE Healthcare) was used. Size-exclusion chromatography was performed in PBS buffer at 25°C and using a flow rate of 0.3 ml/min. The column was calibrated with a molecular mass gel-filtration standard from Bio-Rad containing thyroglobulin (670 kDa),  $\gamma$ -globulin (158 kDa), ovalbumin (44.0 kDa), myoglobin (17.0 kDa), and vitamin B<sub>12</sub> (1.35 kDa). Protein elution was followed by measuring the absorption at 280 nm.

**NF $\kappa$ B-Luciferase Reporter Gene Assay.** HEK293 cells stably expressing NF $\kappa$ B-luciferase were used for the reporter gene assay. The stable cells were dissociated with trypsin, resuspended in DMEM containing 10% FBS at  $5 \times 10^5$  cells per ml, and plated at 20  $\mu$ l per well in a 384-well white plate (Greiner). After 2-h incubation at 5% CO<sub>2</sub> in a 37°C tissue culture incubator, 20  $\mu$ l of mTNF- $\alpha$  was added to the cells. The cells were continuously incubated for 24 h. Luciferase activities were measured by the addition of 20  $\mu$ l of Bright-Glo (Promega), and the plate was read by using a luminescence plate reader.

**ELISA.** Maxisorp 384-well plates (Nunc) were coated with 30  $\mu$ l of 0.5  $\mu$ g/ml protein overnight at 4°C. The coated plates were washed with PBS + 0.05% Tween 20 (PBST), blocked with 80  $\mu$ l of 1% BSA in PBS, and washed again with PBST. The plates were sequentially incubated with 20  $\mu$ l of primary antibody or serum diluted in 1% BSA in PBS, 20  $\mu$ l of HRP-conjugated goat anti-mouse IgG (Jackson ImmunoResearch), and 20  $\mu$ l of TMB substrate (KPL) and read at an absorbance of 650 nm. The plates were washed with PBST between incubations.

**Purification of WT and Mutant mTNF- $\alpha$  Under Native Conditions.** All purification steps were performed at 4°C. After thawing the cell pellet for 15 min on ice, the cell paste was resuspended in lysis buffer [50 mM Tris-HCl (pH 8.0), 150 mM NaCl, 10% (vol/vol) glycerol] at 5 ml per gram of wet weight. After addition of Complete Protease Inhibitor Mixture (Roche), 10 ml of cell suspension was treated with 150  $\mu$ l of lysozyme (100 mg/ml; MP Biomedicals), 50  $\mu$ l of DNase I (5 mg/ml; Roche), 5  $\mu$ l of RNase A (100 mg/ml; Sigma-Aldrich), and 125 units of benzonase nuclease (Novagen). The cell suspension was stirred at room temperature for 20 min to allow lysis to occur. The prelysed cells were then flash-frozen in liquid nitrogen and thawed in a 37°C water bath. This freeze-thaw cycle was repeated once. Complete lysis was then achieved by sonication on ice for 2 min. After

centrifugation at  $18,000 \times g$  for 20 min, 1 ml of Ni-NTA His-Bind Resin (Novagen) was added to the supernatant and mixed on a rotary shaker for 30 min. The lysate-resin mixture was loaded onto a 5-ml polypropylene column (Qiagen) and washed twice with 20 ml of lysis buffer. Protein was eluted by the addition of 2 ml of elution buffer [50 mM Tris-HCl (pH 8.0), 150 mM NaCl, 250 mM imidazole, 10% (vol/vol) glycerol], concentrated with a 10K molecular mass cut-off Amicon Ultra-15 centrifugal filter device (Millipore), and further purified by a Superdex 75 10/300 GL column (flow rate of 0.3 ml/min) preequilibrated with PBS. All proteins were characterized by MALDI-TOF mass spectrometry, which was performed on a Voyager-DE-STR instrument (Applied Biosystems) with sinapinic acid as a matrix at The Scripps Center for Mass Spectrometry, The Scripps Research Institute (La Jolla, CA).

**MS/MS Sequencing of Tryptic Fragment Containing pNO<sub>2</sub>Phe.** The excised gel slice containing the pNO<sub>2</sub>Phe<sup>86</sup>mTNF- $\alpha$  was diced into small pieces and mixed with 100  $\mu$ l of 25 mM NH<sub>4</sub>HCO<sub>3</sub>/50% acetonitrile. After vortexing for 10 min, the supernatant was discarded. This step was repeated twice, before the gel pieces were dried in a Speed Vac for  $\approx 20$  min. The protein sample was reduced by addition of 25  $\mu$ l of 10 mM DTT in 25 mM NH<sub>4</sub>HCO<sub>3</sub>. The reaction was allowed to proceed at 56°C for 1 h. After removal of the supernatant, the gel pieces were mixed with 25  $\mu$ l of 55 mM iodoacetamide. After incubation in the dark for 45 min at room temperature, the gel pieces were subjected to tryptic in-gel digestion. The resultant peptide mixture was purified by C18 ZipTip (Millipore) and subjected to MS/MS fragmentation on a Thermo Finnigan LTQ mass spectrometer (Thermo Scientific), which was run in positive-ion mode using the nanospray source at The Scripps Center for Mass Spectrometry.

**IgG Preparation.** Murine serum was loaded onto a 10-ml Sepharose-conjugated protein G affinity column (GammaBind Plus Sepharose; Amersham Pharmacia Biotech). The column was washed with three column volumes of PBS (pH 7.4). Elution was carried out with two column volumes of 0.1 M acetic acid (pH 3.0). The eluent was then neutralized with 1 M Tris-HCl (pH 9.0) and dialyzed into PBS (pH 7.4).

**T Cell Proliferation Assay.** CD4<sup>+</sup> T cells from immunized mice were isolated from lymph nodes by magnetic depletion with MACS beads (Miltenyi Biotec). T cells were then placed into culture with irradiated splenocytes from naive Bcl-2 mice and increasing amounts of antigen. The cultures were incubated for 48 h and then pulsed with [<sup>3</sup>H]thymidine overnight. The culture plates were harvested onto filter mats and radioactivity was quantified with a TopCount scintillation counter (PerkinElmer).

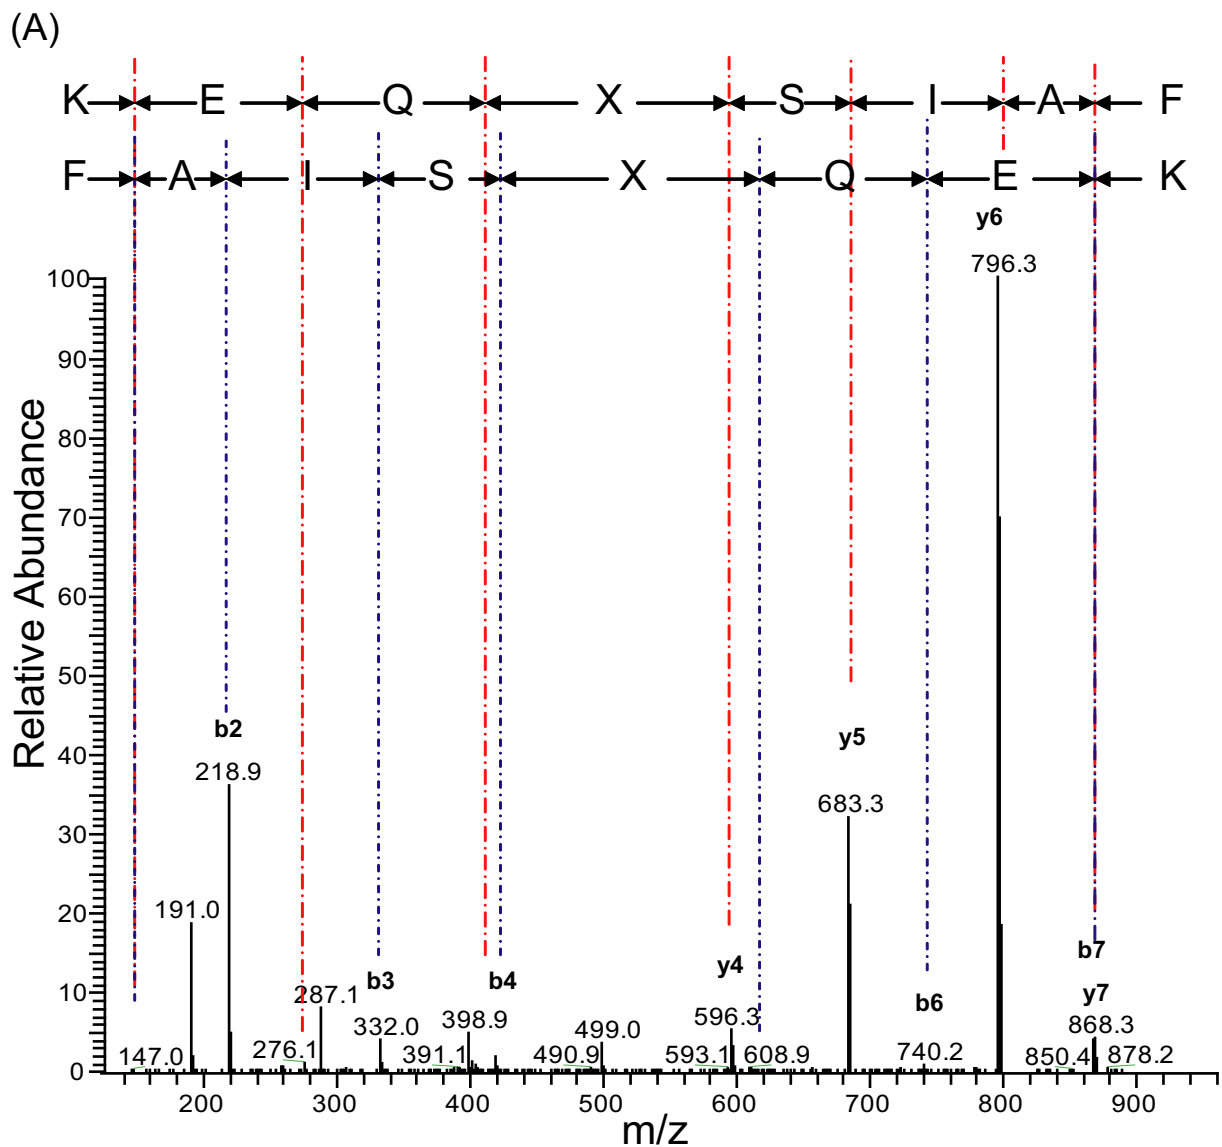

(B)

| Sample                                                                         | Retention time (min) | Observed mass (calculated mass of trimer) (kDa) |
|--------------------------------------------------------------------------------|----------------------|-------------------------------------------------|
| pNO <sub>2</sub> Phe <sup>86</sup> mTNF- $\alpha$ without His <sub>6</sub> tag | 33.00                | 55.2 (51.9)                                     |
| Phe <sup>86</sup> mTNF- $\alpha$ without His <sub>6</sub> tag                  | 33.20                | 53.8 (51.7)                                     |
| pNO <sub>2</sub> Phe <sup>42</sup> mTNF- $\alpha$ with His <sub>6</sub> tag    | 32.64                | 58.0 (57.7)                                     |
| Phe <sup>42</sup> mTNF- $\alpha$ with His <sub>6</sub> tag                     | 32.01                | 63.3 (57.6)                                     |
| wt mTNF- $\alpha$ without His <sub>6</sub> tag                                 | 32.97                | 55.5 (51.8)                                     |
| pNO <sub>2</sub> Phe <sup>11</sup> mTNF- $\alpha$ with His <sub>6</sub> tag    | 32.55                | 58.8 (57.6)                                     |

**Fig. S1.** Characterization of the pNO<sub>2</sub>Phe<sup>86</sup>mTNF- $\alpha$  mutant. (A) Tandem mass spectrum of the octamer fragment FAISXQEK, where X denotes pNO<sub>2</sub>Phe, produced from trypsin digestion of pNO<sub>2</sub>Phe<sup>86</sup>mTNF- $\alpha$ . The partial sequence of the octamer containing pNO<sub>2</sub>Phe can be read from the annotated b (blue) or y (red) ion series. (B) The quaternary structures of pNO<sub>2</sub>Phe<sup>86</sup>mTNF- $\alpha$ , Phe<sup>86</sup> mTNF- $\alpha$ , pNO<sub>2</sub>Phe<sup>42</sup>mTNF- $\alpha$ , Phe<sup>42</sup> mTNF- $\alpha$ , pNO<sub>2</sub>Phe<sup>11</sup>mTNF- $\alpha$ , and WT mTNF- $\alpha$  were determined based on a plot of the logarithm of the molecular mass of the protein standards versus the retention time on a Superdex 75 10/300 GL gel filtration column.

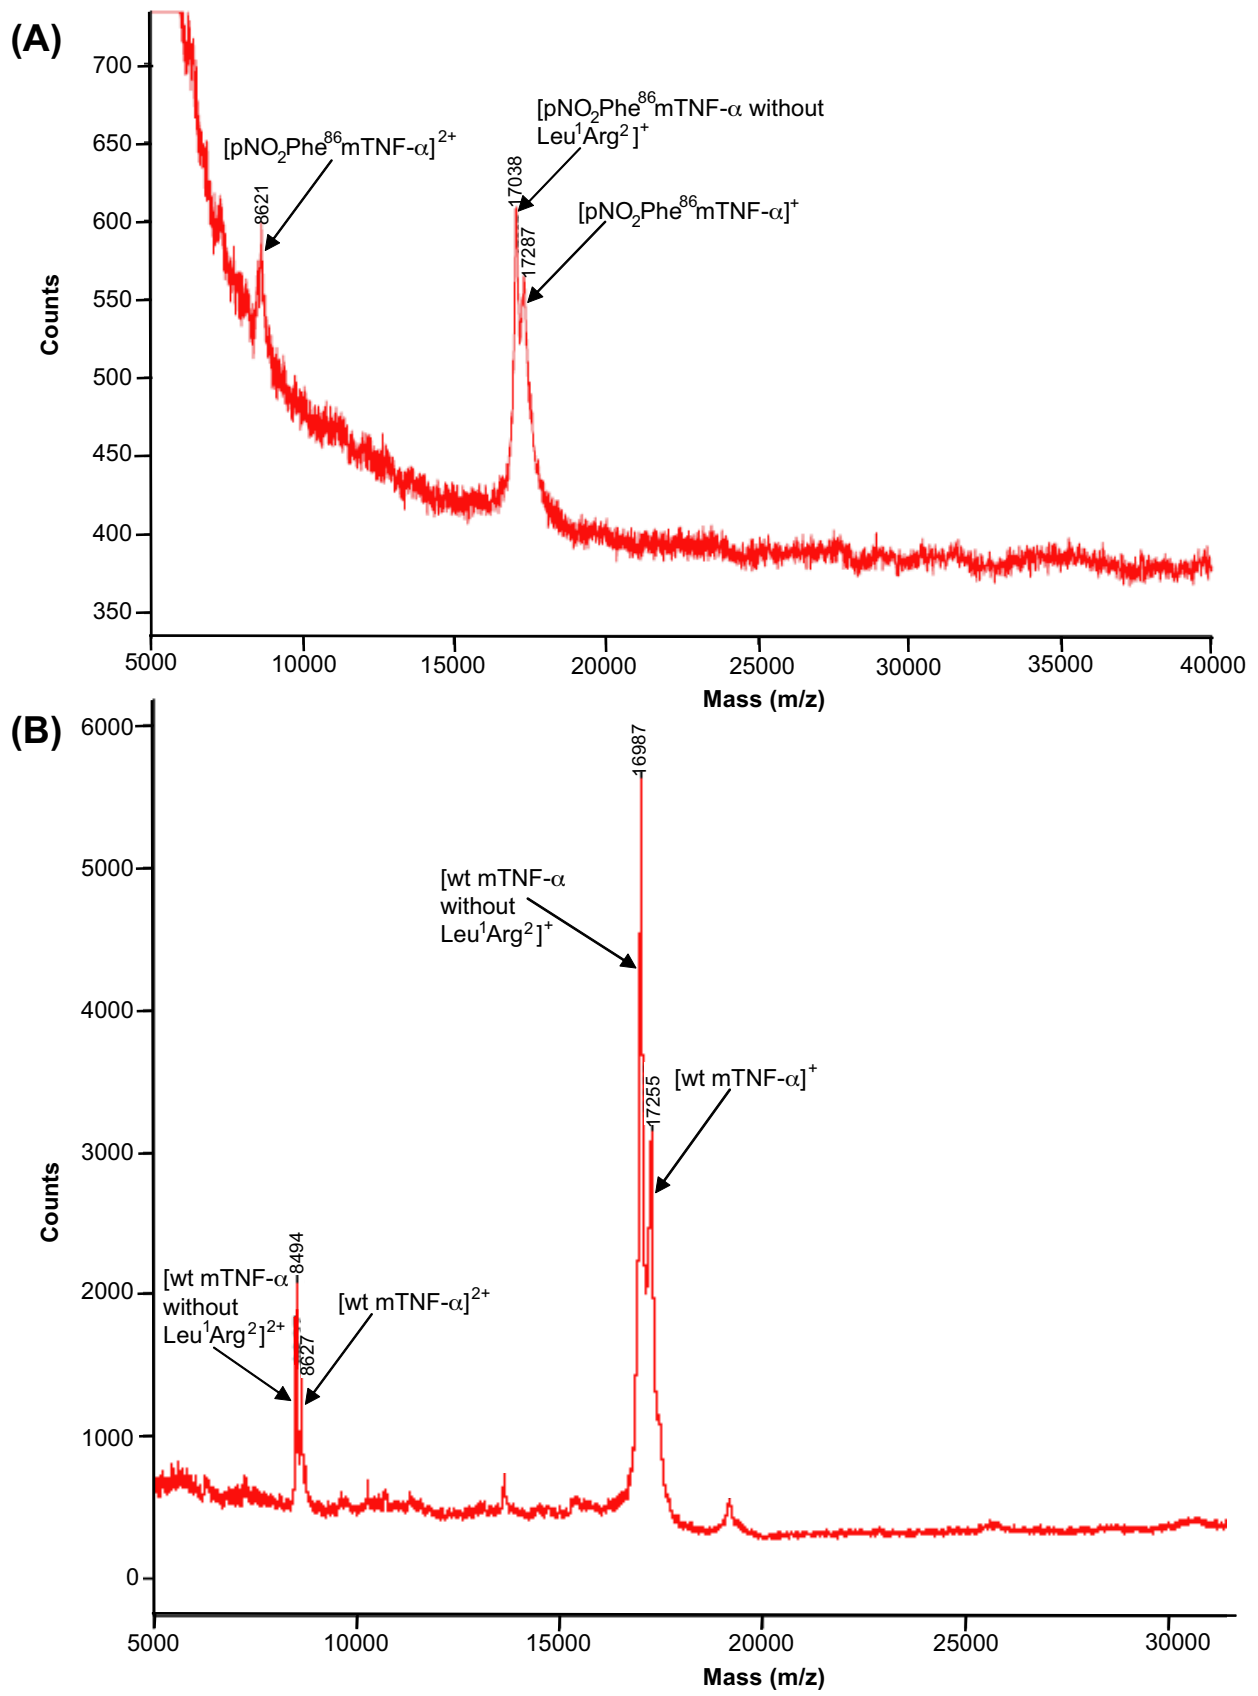

**Fig. S2.** Mass spectrometric analysis of pNO<sub>2</sub>Phe<sup>86</sup>mTNF-α. (A) MALDI-TOF mass spectrometric analysis of pNO<sub>2</sub>Phe<sup>86</sup>mTNF-α. (B) MALDI-TOF mass spectrometric analysis of WT mTNF-α.

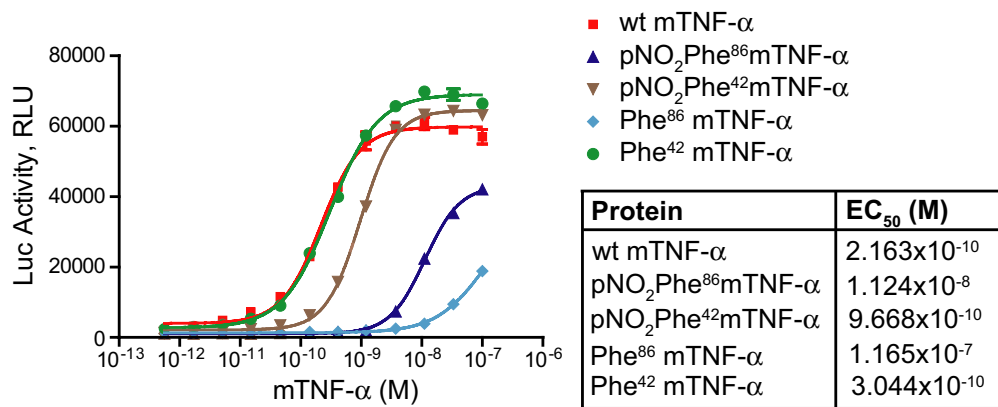

Fig. S3. NF-κB-luciferase activity analysis of WT mTNF-α, pNO<sub>2</sub>Phe<sup>86</sup>mTNF-α, pNO<sub>2</sub>Phe<sup>42</sup>mTNF-α, Phe<sup>86</sup>mTNF-α, and Phe<sup>42</sup>mTNF-α.

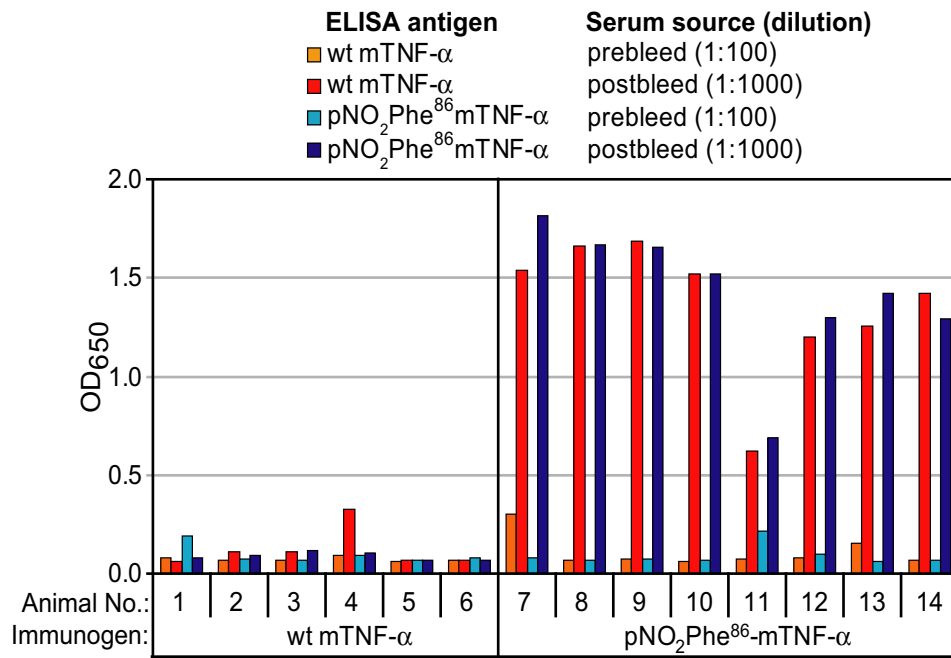

**Fig. S4.** Serum titers against WT mTNF-α and pNO<sub>2</sub>Phe<sup>86</sup>mTNF-α for Bcl2 mice immunized with WT mTNF-α or pNO<sub>2</sub>Phe<sup>86</sup>mTNF-α. The RIMMS protocol involved eight injections (5 μg of protein per injection) over a period of 17 days in the presence of CFA for the initial injection and IFA for the remaining seven injections. ELISAs were measured against WT mTNF-α (red and orange bars) or pNO<sub>2</sub>Phe<sup>86</sup>mTNF-α (blue and light blue bars). Before measurement, serum samples were diluted either 1:100 or 1:1,000 with 1% BSA in PBS buffer.

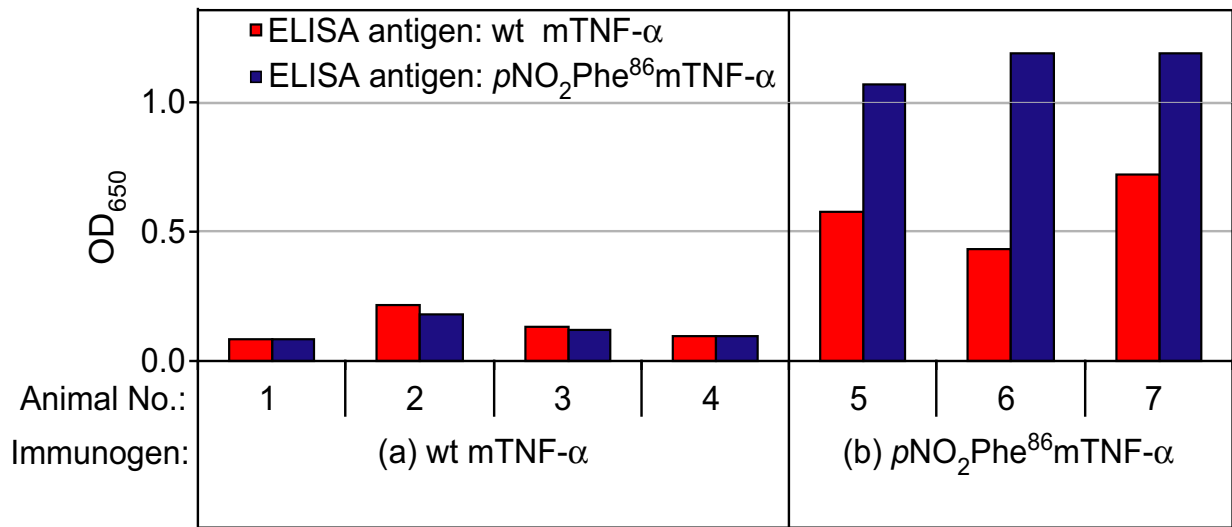

**Fig. S5.** Immunization with pNO<sub>2</sub>Phe<sup>86</sup>mTNF- $\alpha$  in the absence of adjuvant. Serum titers for Bcl-2 mice immunized with WT mTNF- $\alpha$  (a), or pNO<sub>2</sub>Phe<sup>86</sup>mTNF- $\alpha$  (b) for eight injections (5  $\mu$ g of protein per injection) over a period of 17 days in the absence of either CFA or IFA. ELISAs were measured against WT mTNF- $\alpha$  (red bar) or pNO<sub>2</sub>Phe<sup>86</sup>mTNF- $\alpha$  (blue bar). Before measurement, serum samples were diluted 1:1,000 with 1% BSA in PBS buffer.

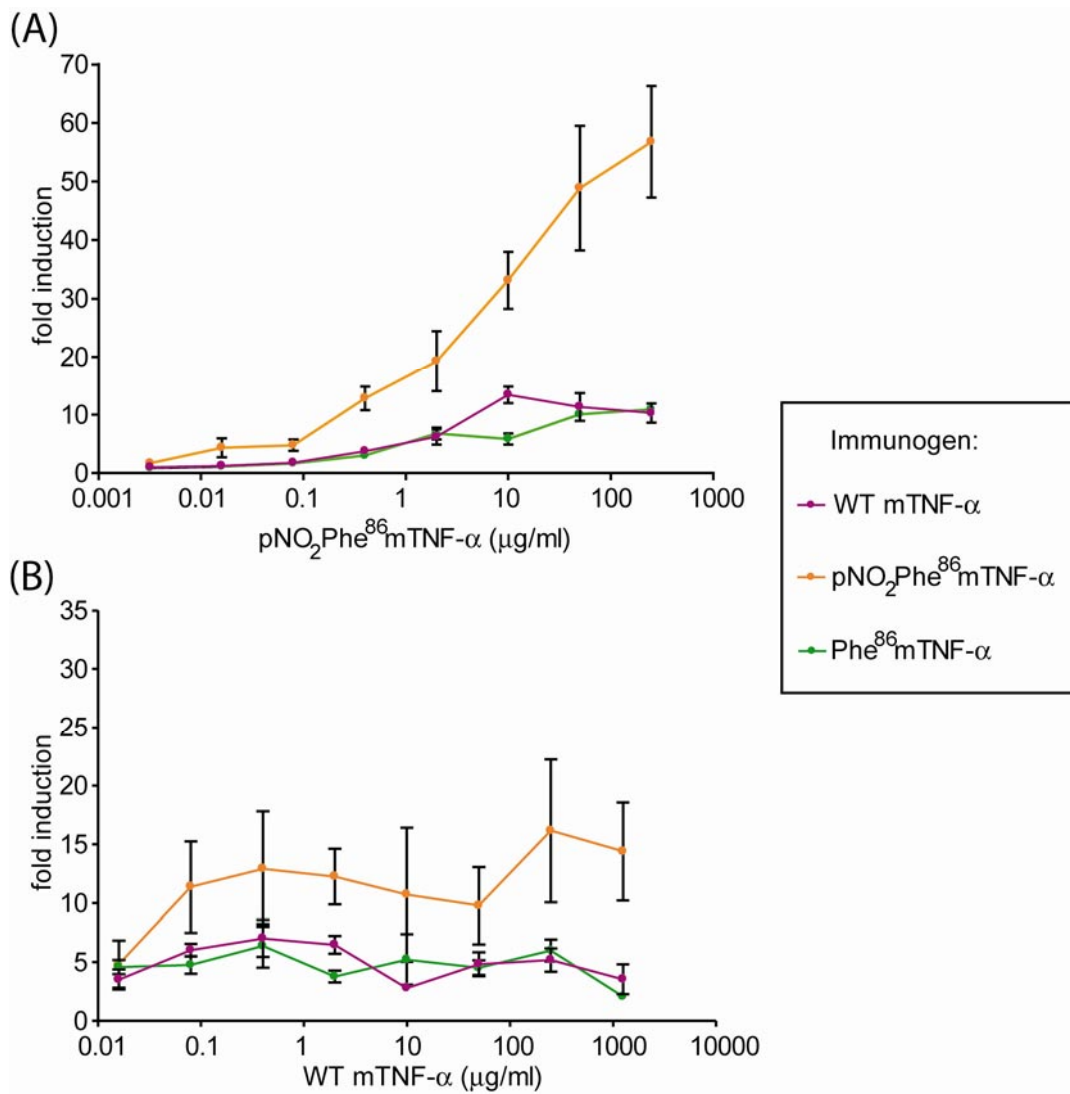

**Fig. S6.** T cell proliferative assay. (A) Proliferation of CD4<sup>+</sup> T cells from Bcl-2 transgenic mice immunized with WT mTNF-α (pink line), pNO<sub>2</sub>Phe<sup>86</sup>mTNF-α (orange line), and Phe<sup>86</sup>mTNF-α (green line) and stimulated *in vitro* with serial dilutions of pNO<sub>2</sub>Phe<sup>86</sup>mTNF-α. (B) Proliferation of CD4<sup>+</sup> T cells from Bcl-2 transgenic mice immunized with WT mTNF-α (pink line), pNO<sub>2</sub>Phe<sup>86</sup>mTNF-α (orange line), and Phe<sup>86</sup>mTNF-α (green line) and stimulated *in vitro* with serial dilutions of WT mTNF-α.

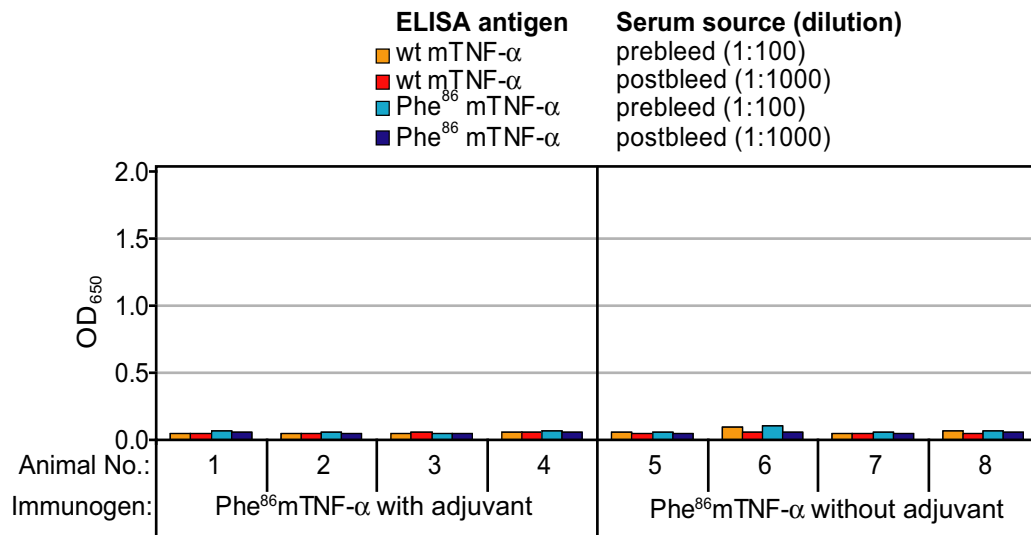

**Fig. S7.** Serum titers against WT mTNF- $\alpha$  and Phe<sup>86</sup> mTNF- $\alpha$  for Bcl2 mice immunized with Phe<sup>86</sup> mTNF- $\alpha$  in the absence or presence of adjuvant. For mice immunized without adjuvant, the RIMMS protocol involved eight injections (5  $\mu$ g of protein per injection) over a period of 17 days. For mice immunized with adjuvant, CFA was used for the first injection and IFA for the remaining seven injections. ELISAs were measured against WT mTNF- $\alpha$  (red and orange bars) or Phe<sup>86</sup> mTNF- $\alpha$  (blue and light blue bars). Before measurement, serum samples were diluted either 1:100 or 1:1,000 with 1% BSA in PBS buffer.



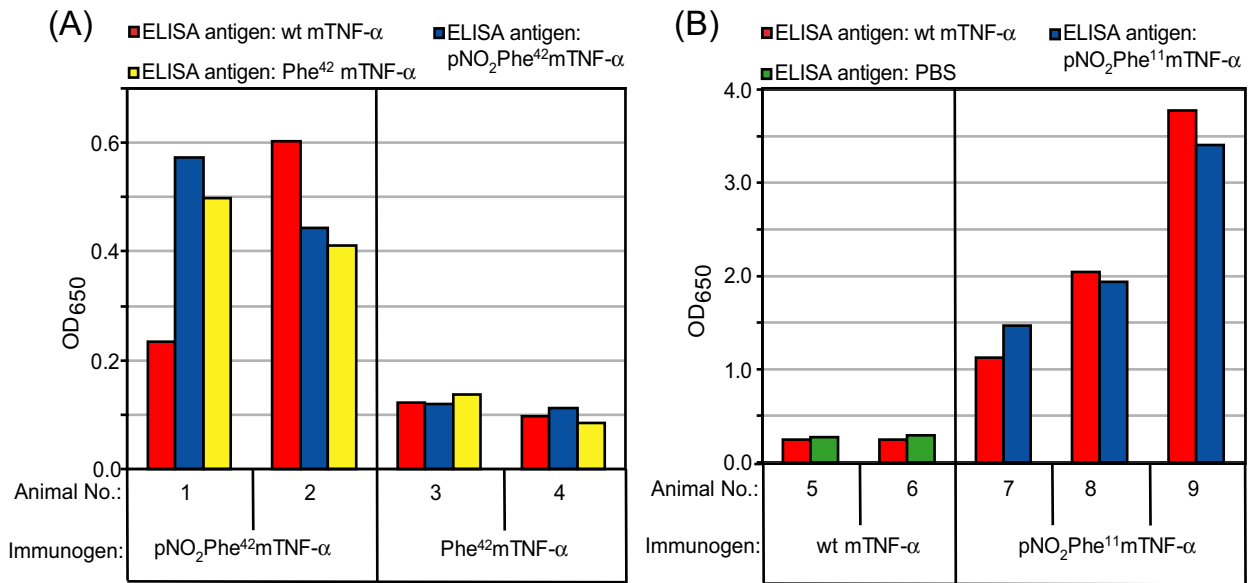

**Fig. 58.** Immunogenicity of other surface sites on mTNF- $\alpha$ . (A) Serum titers against WT mTNF- $\alpha$ , pNO<sub>2</sub>Phe<sup>42</sup>mTNF- $\alpha$ , and Phe<sup>42</sup> mTNF- $\alpha$  for C57BL/6 mice immunized with either pNO<sub>2</sub>Phe<sup>42</sup>mTNF- $\alpha$  or Phe<sup>42</sup> mTNF- $\alpha$ . (B) Serum titers against WT mTNF- $\alpha$ , PBS, and pNO<sub>2</sub>Phe<sup>11</sup>mTNF- $\alpha$  for C57BL/6 mice immunized with either pNO<sub>2</sub>Phe<sup>11</sup>mTNF- $\alpha$  or WT mTNF- $\alpha$ . The RIMMS protocol involved eight injections (5  $\mu$ g of protein per injection) over a period of 17 days in the absence of adjuvant. ELISAs were measured against WT mTNF- $\alpha$  (red bars), pNO<sub>2</sub>Phe<sup>42</sup>mTNF- $\alpha$ /pNO<sub>2</sub>Phe<sup>11</sup>mTNF- $\alpha$  (blue bars), Phe<sup>42</sup>mTNF- $\alpha$  (yellow bars), or PBS (green bars). Before measurement, serum samples were diluted 1/100 (A) or 1/800 (B) with 1% BSA in PBS buffer.

Table 1. MS/MS sequencing of a tryptic fragment of pNO<sub>2</sub>Phe<sup>86</sup>mTNF-a

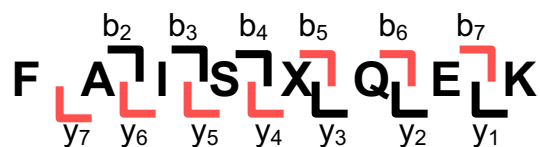

|                                                  | Observed mass, Da | Calculated mass, Da |
|--------------------------------------------------|-------------------|---------------------|
| <b>y-series ions</b>                             |                   |                     |
| [y <sub>1</sub> ] <sup>+</sup>                   | 147.0             | 147.1               |
| [y <sub>2</sub> ] <sup>+</sup>                   | 276.1             | 276.2               |
| [y <sub>2</sub> -H <sub>2</sub> O] <sup>+</sup>  | 258.1             | 258.1               |
| [y <sub>2</sub> -NH <sub>3</sub> ] <sup>+</sup>  | 259.2             | 259.1               |
| [y <sub>3</sub> ] <sup>+</sup>                   | 404.4             | 404.2               |
| [y <sub>3</sub> -H <sub>2</sub> O] <sup>+</sup>  | 386.2             | 386.2               |
| [y <sub>4</sub> ] <sup>+</sup>                   | 596.3             | 596.3               |
| [y <sub>5</sub> ] <sup>+</sup>                   | 683.3             | 683.3               |
| [y <sub>5</sub> -H <sub>2</sub> O] <sup>+</sup>  | 665.4             | 665.3               |
| [y <sub>5</sub> -H <sub>2</sub> O] <sup>2+</sup> | 333.1             | 333.1               |
| [y <sub>5</sub> -NH <sub>3</sub> ] <sup>+</sup>  | 666.3             | 666.3               |
| [y <sub>6</sub> ] <sup>+</sup>                   | 796.3             | 796.4               |
| [y <sub>6</sub> ] <sup>2+</sup>                  | 398.9             | 398.7               |
| [y <sub>6</sub> -H <sub>2</sub> O] <sup>+</sup>  | 778.3             | 778.4               |
| [y <sub>6</sub> -NH <sub>3</sub> ] <sup>+</sup>  | 779.5             | 779.4               |
| [y <sub>7</sub> ] <sup>+</sup>                   | 867.3             | 867.4               |
| [y <sub>7</sub> ] <sup>2+</sup>                  | 434.2             | 434.2               |
| [y <sub>7</sub> -H <sub>2</sub> O] <sup>+</sup>  | 849.6             | 849.4               |
| <b>b-series ions</b>                             |                   |                     |
| [b <sub>2</sub> ] <sup>+</sup>                   | 218.9             | 219.1               |
| [b <sub>3</sub> ] <sup>+</sup>                   | 332.0             | 332.2               |
| [b <sub>4</sub> ] <sup>+</sup>                   | 419.1             | 419.2               |
| [b <sub>4</sub> -H <sub>2</sub> O] <sup>+</sup>  | 401.1             | 401.2               |
| [b <sub>4</sub> -H <sub>2</sub> O] <sup>2+</sup> | 201.1             | 201.1               |
| [b <sub>5</sub> ] <sup>+</sup>                   | 611.3             | 611.3               |
| [b <sub>5</sub> ] <sup>2+</sup>                  | 305.9             | 306.1               |
| [b <sub>5</sub> -H <sub>2</sub> O] <sup>+</sup>  | 593.2             | 593.3               |
| [b <sub>6</sub> ] <sup>+</sup>                   | 739.4             | 739.3               |
| [b <sub>6</sub> -H <sub>2</sub> O] <sup>+</sup>  | 721.3             | 721.3               |
| [b <sub>7</sub> ] <sup>+</sup>                   | 868.3             | 868.4               |
| [b <sub>7</sub> -H <sub>2</sub> O] <sup>+</sup>  | 850.3             | 850.4               |
| [b <sub>7</sub> -NH <sub>3</sub> ] <sup>+</sup>  | 851.1             | 851.4               |
| [b <sub>7</sub> ] <sup>+</sup>                   | 868.3             | 868.4               |
| [b <sub>7</sub> -H <sub>2</sub> O] <sup>+</sup>  | 850.4             | 850.4               |

The sequence of the tryptic fragment containing pNO<sub>2</sub>Phe is shown in single letter code (X, pNO<sub>2</sub>Phe). Observed fragment ions of the y and b series are indicated. Key y and b ions proving the incorporation of pNO<sub>2</sub>Phe are represented in red. All masses are reported as monoisotopic masses.
